# Supplementary material for: Effects of in-situ stroboscopic training on visual, visuomotor and reactive agility in youth volleyball players
Source: PeerJ. 2023 May 22;11:e15213. doi: 10.7717/peerj.15213 (PMC10211363; doi:10.7717/peerj.15213)
Supplement: Supplemental Information 1 — The data was used for statistical analyses to compare stroboscopic vs non-stroboscopic interventions. [file peerj-11-15213-s001.xlsx]

## Sheet: Arkusz1
Code	Group	RT/S1 RawScore - pre-test - simple motor time	RT/S1 RawScore - post-test - simple motor time	RT/S1 RawScore - retention-test - simple motor time	RT/S1 RawScore - pre-test - simple reaction time	RT/S1 RawScore - post-test- simple reaction time	RT/S1 RawScore - post-test - simple reaction time	DT/S1 RawScore - pre-test - complex reaction speed	DT/S1 RawScore - post-test - complex reaction speed	DT/S1 RawScore - retention-test - complex reaction speed	FLIM/S3 RawScore - pre-test - frequency [Hz]	FLIM/S3 RawScore - post-test - frequency [Hz]	FLIM/S3 RawScore - retention-test - frequency [Hz]	Reactive agility_pre test	Reactive agility_post test	Reactive agility_retention- test	Saccade velocity [į/s]_pre-test	Saccade velocity [į/s]_post-test	Saccade velocity [į/s]_retention-test
1	Non-stroboscopic	171	168	170	447	393	401	830	860	840	41.688	40.775	41.425	20.4	20.35	20.8	86.574	91.807	89.65
2	Non-stroboscopic	175	187	179	365	341	352	740	700	710	44.063	47.825	45.487	18.74	18.65	18.85	88.053	84.32	85.498
3	Non-stroboscopic	130	120	131	275	269	260	670	660	670	39.913	38.532	37.513	20.01	20.01	18.78	83.003	95.241	99.401
4	Non-stroboscopic	105	132	116	225	238	226	730	740	690	47.463	47.713	50.688	19.27	16.51	17.17	98.842	99.031	88.843
5	Non-stroboscopic	126	122	132	260	206	279	640	640	650	45.525	44.513	43.338	19.05	18.93	19.36	101.651	95.617	104.607
6	Non-stroboscopic	161	161	162	256	240	244	660	640	650	55.363	58.825	56.985	18.99	18.74	18.92	84.369	90.524	95.684
7	Non-stroboscopic	178	150	156	255	258	258	690	630	620	42.838	42.775	42.463	20.39	19.47	18.53	86.517	85.664	92.58
8	Non-stroboscopic	109	94	110	229	225	232	680	670	600	49.7	47	48.95	18.18	18.12	18.01	94.305	95.862	96.548
9	Non-stroboscopic	147	136	135	320	321	316	730	690	680	47.013	41.922	38.025	17.8	17.03	17.5	108.757	99.427	100.465
10	Non-stroboscopic	118	115	123	220	247	249	850	820	770	42.963	40.55	41.938	18.1	19.01	18.01	87.288	94.4	108.4
11	Non-stroboscopic	103	105	114	236	233	203	790	780	700	44.163	42.95	43.313	19	19.17	19.34	107.638	115.411	97.9
12	Non-stroboscopic	92	101	114	267	288	267	870	830	830	51.55	55.988	54.888	17.76	18.28	18.79	81.919	86.245	99.814
13	Stroboscopic	163	162	109	320	309	275	800	730	710	44.8	44.925	45.025	20.58	19	19.69	87.422	89.957	88.442
14	Stroboscopic	101	100	113	225	220	239	800	760	710	57.25	56.513	56.2	19.59	19.16	19.35	98.85	103.546	99.595
15	Stroboscopic	176	166	166	296	288	320	660	600	600	44.863	47.463	52.3	18.93	17.78	20.32	83.223	95.966	99.624
16	Stroboscopic	126	129	119	195	206	206	760	710	720	42.038	44.45	41.163	18.75	18.16	18.53	85.036	106.372	98.79
17	Stroboscopic	175	155	148	250	236	269	750	680	640	47.313	42.344	45.15	18.05	17.86	18.88	91.032	85.297	107.315
18	Stroboscopic	125	101	105	262	256	241	720	640	630	43.65	47.725	38.188	18.32	18.09	18.1	93.491	84.17	106.527
19	Stroboscopic	141	122	120	386	322	392	730	620	630	36.95	40.163	36.95	19.86	17.74	19.56	83.458	103.747	105.629
20	Stroboscopic	222	219	218	265	292	293	850	800	870	33.9	49.325	49.65	20.43	17.15	18.69	82.743	104.687	91.723
21	Stroboscopic	190	151	165	368	322	325	820	730	770	49.113	44.625	30.638	19.54	19.25	18.01	85.676	84.917	109.561
22	Stroboscopic	199	180	227	305	303	331	780	710	710	50.875	50.9	51.35	18.66	18	19.23	81.034	102.168	89.232
23	Stroboscopic	143	133	113	289	302	264	680	640	630	39.075	43.238	41.763	19.22	18.21	18.92	88.675	98.587	107.163
24	Stroboscopic	134	135	154	310	308	306	720	670	680	39.013	59.875	36.75	18.88	18.72	19.09	84.369	88.326	104.813
25	Non-stroboscopic	207	212	195	244	257	242	680	610	580	51.563	50.15	53.975	17.16	17.29	16.78	108.821	101.65	110.654
26	Non-stroboscopic	166	96	119	248	268	268	640	660	620	48.688	54.825	57.213	17.87	17.29	16.54	121.489	119.231	119.653
27	Non-stroboscopic	163	165	144	282	292	276	710	700	680	41.35	39.589	41.788	16.24	16	17.1	103.134	107.995	105.654
28	Non-stroboscopic	122	120	133	299	292	299	660	670	680	54.7	42.288	45.563	20.13	20.14	19.53	102.045	92.484	104.357
29	Non-stroboscopic	125	121	110	252	269	277	730	680	640	44.45	46.275	43.125	17.5	17.7	17.22	106.53	108.318	107.27
30	Non-stroboscopic	136	108	129	333	291	302	710	690	690	44.05	44.175	59.875	17.17	17.04	16.19	102.147	98.805	105.987
31	Non-stroboscopic	75	104	120	236	238	256	680	640	630	48.563	50.2	50.938	18.4	18.88	17.47	102.424	86.236	89.987
32	Non-stroboscopic	143	158	153	334	306	319	780	750	760	51.013	51.05	53.263	18.68	17.92	18.14	120.961	108.248	115.366
33	Non-stroboscopic	96	111	96	245	314	261	690	650	640	41.363	49.538	50.676	19.41	18.15	18.87	105.183	110.634	106.598
34	Non-stroboscopic	75	79	92	239	251	263	630	600	590	47.488	44.65	40.5	18.35	18.32	16.77	103.118	92.354	94.654
35	Non-stroboscopic	121	138	138	297	317	300	840	860	890	44.9	40.763	40.54	18.16	18.02	18.01	111.399	104.744	108.527
36	Non-stroboscopic	129	132	123	228	208	224	690	650	630	52.513	53.688	51.113	18.41	19.04	16.27	105.174	93.746	98.654
37	Non-stroboscopic	85	93	87	251	252	267	670	610	680	47.988	50.55	43.363	20.13	19.79	18.02	101.165	97.02	96.543
38	Stroboscopic	118	106	86	237	243	248	690	630	580	40.838	39.038	40.213	18.56	18.29	18.83	106.062	95.7	98.684
39	Stroboscopic	123	117	77	297	286	285	670	640	600	37.063	40.3	39.013	16.35	16.4	16.99	96.437	98.584	97.265
40	Stroboscopic	82	74	79	215	210	210	620	570	540	48.975	45.55	46.8	17.52	16.51	16.5	116.934	118.266	112.354
41	Stroboscopic	106	77	80	253	232	234	720	610	660	40.95	43.425	41.938	17.18	16.84	16.86	101.438	105.239	99.587
42	Stroboscopic	93	61	98	232	208	230	680	610	590	43.9	47.388	48.088	17.68	18.39	17.31	95.641	90.547	98.69
43	Stroboscopic	116	93	86	234	225	243	830	750	750	46	46.288	49.1	17.49	16.93	17.11	99.622	98.287	102.354
44	Stroboscopic	96	98	102	282	259	268	690	650	610	43.563	43.375	42.688	16.98	17.33	16.81	115.586	119.068	116.584
45	Stroboscopic	138	87	92	265	270	287	720	640	600	40.85	47.825	44.325	17.16	16.68	16.11	101.133	109.732	102.356
46	Stroboscopic	116	119	116	265	259	282	750	700	640	47.15	50.088	54.613	16.88	16.68	16.68	92.553	99.188	92.598
47	Stroboscopic	80	97	109	251	250	276	720	670	620	39.588	40.175	41.563	17.06	16.88	16.34	103.802	99.156	104.658
48	Stroboscopic	144	100	152	233	256	266	810	730	780	38.938	43.788	44.625	16.5	16.88	15.92	98.229	97.366	98.974
49	Stroboscopic	104	76	80	259	259	265	650	600	540	55.425	52.438	49.688	17.47	16.79	16.48	93.812	99.265	96.254
50	Stroboscopic	124	112	116	280	259	256	810	770	760	48.275	53.838	52.1	16.95	16.81	16.64	91.314	103.254	105.654
